# Supplementary material for: Allogeneic stem cell transplantation in chronic myelomonocytic leukemia: analysis of post-transplant survival and risk factors in 138 Mayo Clinic patients
Source: Research Square preprint supplement (doi:10.21203/rs.3.rs-6753879/v1), 2025-06-09
Supplement: Supplementary file 1 [file 12459cd029c98423a17a08b7.docx]

Table 1: clinical and laboratory characteristics at the time of initial diagnosis of chronic myelomonocytic leukemia in 138 Mayo Clinic patients who subsequently underwent allogeneic stem cell transplantation stratified by pre-transplant history of blast transformation.

| Variables | Entire cohort  (n=138) | Patients transplanted in chronic phase CMML  (n=104) | Patients with pre-transplant history of blast transformation  (n=34) | P  value |
| --- | --- | --- | --- | --- |
| Age at diagnosis, years, median (range) | 62 (18-75) | 62 (28-75) | 58 (18-73) | 0.05 |
| Male, n (%) | 85 (62) | 63 (60) | 22 (65) | 0.6 |
| Age at ASCT, years, median (range) | 63 (18-76) | 64 (29-76) | 59.5 (18-75) | 0.2 |
| WHO subtype, n (%) (evaluable = 130)  CMML1  CMML2 | 102 (78)  28 (22) | 80 (82)  18 (18) | 22 (69)  10 (31) | 0.1 |
| FAB subtype, n (%) (evaluable = 129)  Dysplastic  Proliferative | 70 (54)  59 (46) | 56 (58)  41 (42) | 14 (44)  18 (56) | 0.1 |
| Leukocytes, x 109/L; median (range) | 10 (1.4-128) | 10.3 (1.4-128) | 21.6 (2.4-112) | 0.1 |
| AMC, x 109/L; median (range) | 2.3 (0.08-46) | 2.1 (0.08-46) | 3.5 (0.1-36) | 0.1 |
| Hemoglobin, g/dl ; median (range) | 10.65 (4-15.9) | 10.8 (4-15.9) | 10.3 (4.5-14.9) | 0.3 |
| Platelets, x 109/L; median (range) | 101 (13-767) | 100 (13-767) | 116 (13-325) | 0.5 |
| Circulating blast %; median (range) | 0 (0-15) | 0 (0-15) | 1 (0-12) | 0.1 |
| Bone marrow blast %; median  (range) | 3 (0-18) | 3 (0-18) | 5 (0-17) | 0.9 |
| CPSS-Mol score, n (%) (evaluable = 82)  Low  Intermediate-1  Intermediate-2  High | 14 (17)  9 (11)  33 (40)  26 (32) | 12 (17)  9 (13)  26 (37)  23 (33) | 2 (17)  0  7 (58)  3 (25) | 0.2 |
| BLAST score, n (%) (evaluable = 129)  Low  Intermediate  High | 49 (38)  57 (44)  23 (18) | 41 (42)  40 (41)  17 (17) | 8 (26)  17 (55)  6 (19) | 0.2 |
| BLAST-mol score, n (%) (evaluable = 79)  Low  Intermediate  High | 17 (21)  34 (43)  28 (36) | 15 (22)  29 (43)  23 (34) | 2 (17)  5 (41)  5 (42) | 0.8 |
| Cytogenetics, n (%)  Normal/loss of Y chromosome  Abnormal | 93 (69)  41 (31) | 73 (71)  30 (29) | 20 (65)  11 (35) | 0.5 |
| Mutations, n (%) (evaluable = 86)  *ASXL1*  *TET2*  *SRSF2*  *RUNX1*  *DNMT3A*  *SETBP1*  *PHF6* | 49 (56)  38 (44)  35 (40)  17 (24)  8 (10)  7 (8)  8 (10) | 43 (59)  33 (46)  29 (40)  17 (24)  8 (12)  6 (9)  7 (10) | 6 (42)  5 (35)  6 (42)  0  0  1 (7)  1 (7) | 0.2  0.4  0.9 **0.01**  0.09  0.9  0.8 |
| First line chemotherapy prior to ASCT, n (%)  (evaluable = 125)  HMA/Venetoclax  Intensive chemotherapy  Other¶/clinical trials  None | 75 (60)  29 (23)  16 (13)  5 (4) | 64 (68)  10 (11)  15 (16)  5 (5) | 11 (35)  19 (61)  1 (4) | **0.01** |
| HMA therapy prior to ASCT, n (%)  (evaluable = 137)  Yes  No | 78 (57)  59 (43) | 66 (64)  37 (36) | 12 (36)  22 (64) | **0.01** |
| Intensive chemotherapy prior to ASCT, n (%)  (evaluable = 137)  Yes  No | 40 (29)  97 (71) | 13 (13)  90 (87) | 27 (79)  7 (21) | **0.01** |

AMC: absolute monocyte counts. ASCT: allogeneic stem cell transplant. FAB: French-American-British classification system. HMA: hypomethylating agent. WHO: world health organization.

¶Hydroxyurea, erythropoietin agonist, danazol, Ruxolitinib are included in ‘’other’’ if no chemotherapy received.
