# Supplementary material for: Allogeneic stem cell transplantation in chronic myelomonocytic leukemia: analysis of post-transplant survival and risk factors in 138 Mayo Clinic patients
Source: Research Square preprint supplement (doi:10.21203/rs.3.rs-6753879/v1), 2025-06-09
Supplement: Supplementary file 2 [file 483281dd10c4eb86a6ed81a1.docx]

Table 2: clinical and laboratory characteristics of 138 Mayo Clinic patients with chronic myelomonocytic leukemia at the time allogeneic stem cell transplantation stratified by pre-transplant history of blast transformation.

| Variables | Entire cohort  (n=138) | Patients transplanted in chronic phase CMML  (n=104) | Patients with pre-transplant history of blast transformation  (n=34) | P  value |
| --- | --- | --- | --- | --- |
| Bone marrow blast %, n (%)  (evaluable = 126)  Less than 5%  5-9%  10-19%  More than 19% | 102 (81)  17 (14)  6 (4)  1 (1) | 76 (80)  15 (16)  4 (4)  0 | 26 (85)  2 (6)  2(6)  1 (3) | 0.1 |
| Donor types, n (%) n (%)  (evaluable = 135)  Matched sibling  Matched unrelated  Mismatched unrelated  Haploidentical  Double cord blood | 34 (25)  79 (58)  9 (7)  12 (9)  1 (1) | 24 (23)  65 (62)  7 (7)  7 (7)  1 (1) | 10 (32)  14 (45)  2 (7)  5 (16)  0 | 0.3 |
| Conditioning intensity, n (%)  (evaluable = 133)  MAC  RIC  NMA | 36 (26)  99 (73)  1 (1) | 25 (24)  78 (75)  1 (1) | 11 (34)  21 (66)  0 | 0.4 |
| Conditioning regimen, n (%)  (evaluable = 130)  Busulfan-based MAC  Cy/TBI MAC  Busulfan-based RIC  Melphalan-based RIC  Flu/Cy/TBI-based RIC  Others | 17 (13)  15 (12)  21 (16)  64 (49)  9 (7)  4 (3) | 16 (16)  6 (6)  15 (15)  52 (51)  8 (8)  4 (4) | 1 (3)  9 (32)  6 (21)  12 (41)  1 (3)  0 | **0.01** |
| GVHD prophylaxis, n (%)  (evaluable = 131)  Methotrexate-based  PTCy-based  Others | 84 (64)  39 (30)  8 (6) | 64 (64)  32 (32)  4 (4) | 20 (64)  7 (23)  4 (13) | 0.1 |
| Donor gender, Male, n (%)  (evaluable = 119) | 79 (57) | 60 (58) | 19 (55) | 0.8 |
| Donor age, years, median (range)  (evaluable = 97) | 30 (13-73) | 29 (13-71) | 35 (19-73) | 0.3 |
| Time to ANC engraftment, days (range) | 18 (6-50) | 18 (6-50) | 19 (9-32) | 0.5 |
| Time to platelets engraftment, days (range) | 24 (9-166) | 25 (9-166) | 21 (13-72) | 0.5 |
| Day 100 bone marrow, n (%)  (evaluable = 110)  Remission  Relapse/persistent disease  Progression to blast phase |  | 78 (91)  5 (6)  2 (3) | 21 (84)  4 (16)  n/a | **0.01** |
| Day 100 cytogenetics, n (%)  (evaluable = 95)  Normal  Abnormal | 79 (83)  16 (17) | 59 (82)  13 (18) | 20 (87)  3 (13) | 0.5 |
| Day 100 chimerism, n (%)  (evaluable = 99)  Full  Mixed  Lost | 72 (72)  26 (27)  1 (1) | 57 (70)  23 (29)  1 (1) | 15 (83)  3 (17)  0 | 0.4 |
| Time from diagnosis to ASCT, months, median (range) | 11 (0-201) | 11 (0-201) | 11 (3-52) | 0.7 |

ANC: absolute neutrophils counts. ASCT: allogeneic stem cell transplant. Cy/TBI: cyclophosphamide/total body irradiation. Flu/Cy/TBI: fludarabine/cyclophosphamide/total body irradiation.GVHD: graft versus host disease. GFRS: GVHD-free relapse free survival. HMA: hypomethylating agent. MAC: Myeloablative conditioning. NMA: Non-myeloablative conditioning. PTCy: post-transplant cyclophosphamide. RIC: Reduced intensity conditioning.
